# Supplementary material
Source: Springer Nature journal article supplement (https://www.springermedizin.de/resource/supplementary/12955_2010_738_MOESM3_ESM.pdf/9560886)

**Figure 2: Pooled Estimate in MID Units**

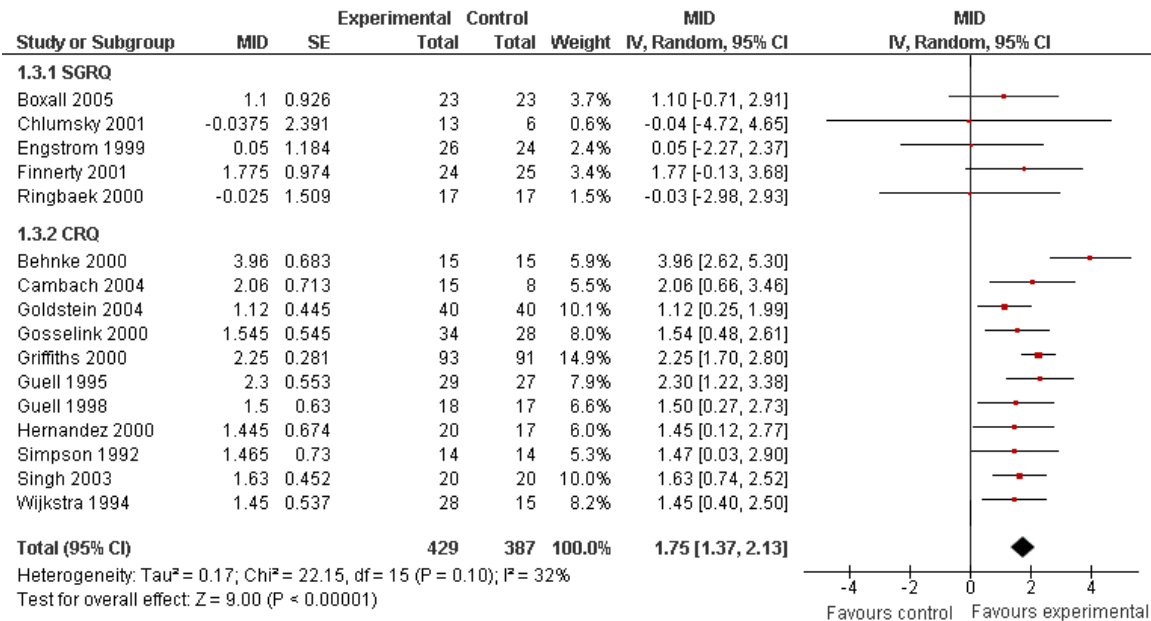

Supplement: MOESM3 [file 9560886]
